# Supplementary material for: Implementation Outcomes and Indicators as a New Challenge in Health Services Research: A Systematic Scoping Review
Source: PubMed Central journal article supplement — Inquiry. 2019 Jul 26;56:0046958019861257. doi: 10.1177/0046958019861257 (PMC6661793; doi:10.1177/0046958019861257), 2019-07-26
Supplement: 2019.05.04_Suplementary_Implementation_success_indicators.pdf [file 2019.05.04_Suplementary_Implementation_success_indicators.pdf]

## Appendix 1

### Appendix 1: Search

| Search step                                           | Hits    | Search                                                                                                                                                                                                                                                                                                                                                                                                                                                                                                                                                                                      |
|-------------------------------------------------------|---------|---------------------------------------------------------------------------------------------------------------------------------------------------------------------------------------------------------------------------------------------------------------------------------------------------------------------------------------------------------------------------------------------------------------------------------------------------------------------------------------------------------------------------------------------------------------------------------------------|
| <b>MEDLINE (PubMed) Database: MEDLINE (2008-2018)</b> |         |                                                                                                                                                                                                                                                                                                                                                                                                                                                                                                                                                                                             |
| Date of search: 1.08.2018                             |         |                                                                                                                                                                                                                                                                                                                                                                                                                                                                                                                                                                                             |
| 1                                                     | 118,507 | implementation[Title] OR implementations[Title] OR implementing[Title] OR implement[Title] OR implements[Title] OR implemented[Title] OR “process evaluation”[Title] OR “formative evaluation” [Title] OR “knowledge translation”[Title] OR dissemination[Title] OR acceptability[Title] OR adoption[Title] OR appropriateness[Title] OR “implementation costs”[Title] OR feasibility[Title] OR fidelity[Title] OR penetration[Title] OR sustainability[Title] OR routinization[Title] OR institutionalization[Title] OR penetration[Title] OR applicability[Title] OR compatibility[Title] |
| 2                                                     | 534,978 | measure[Title] OR measures[Title] OR measurement[Title] OR measuring [Title] OR indicator[Title] OR indicators[Title] OR index[Title] OR indices[Title] OR rates[Title] OR validation[Title] OR monitoring[Title] OR “outcome assessment”[Title] OR “process assessment”[Title]                                                                                                                                                                                                                                                                                                             |
| 3                                                     | 4,739   | #1 AND #2                                                                                                                                                                                                                                                                                                                                                                                                                                                                                                                                                                                   |
| 4                                                     | 3,110   | limit to 2008/08/01-2018/08/01                                                                                                                                                                                                                                                                                                                                                                                                                                                                                                                                                              |
| 5                                                     | 2,395   | limit to MEDLINE                                                                                                                                                                                                                                                                                                                                                                                                                                                                                                                                                                            |
| <b>CINAHL (EBSCO) Database: CINAHL (2008-2018)</b>    |         |                                                                                                                                                                                                                                                                                                                                                                                                                                                                                                                                                                                             |
| Date of search: 1.08.2018                             |         |                                                                                                                                                                                                                                                                                                                                                                                                                                                                                                                                                                                             |
| 1                                                     | 51,951  | TI (implementation OR implementations OR implementing OR implement OR implements OR implemented OR “process evaluation” OR “formative evaluation” OR “knowledge translation” OR dissemination OR acceptability OR adoption OR appropriateness OR “implementation costs” OR feasibility OR fidelity OR penetration OR sustainability OR routinization OR institutionalization OR penetration OR applicability OR compatibility)                                                                                                                                                              |

## Appendix 1: Search

| Search step                                            | Hits    | Search                                                                                                                                                                                                                                                                                                                                                                                                                            |
|--------------------------------------------------------|---------|-----------------------------------------------------------------------------------------------------------------------------------------------------------------------------------------------------------------------------------------------------------------------------------------------------------------------------------------------------------------------------------------------------------------------------------|
| 2                                                      | 142,900 | TI (measure OR measures OR measurement OR measuring OR indicator OR indicators OR index OR indices OR rates OR validation OR monitoring OR “outcome assessment” OR “process assessment”)                                                                                                                                                                                                                                          |
| 3                                                      | 2,161   | #1 AND #2                                                                                                                                                                                                                                                                                                                                                                                                                         |
| 4                                                      | 1,699   | limit to 2008/08-2018/08                                                                                                                                                                                                                                                                                                                                                                                                          |
| 5                                                      | 642     | exclude MEDLINE records                                                                                                                                                                                                                                                                                                                                                                                                           |
| <b>EMBASE (OVID) Database: EMBASE (2008-2018)</b>      |         |                                                                                                                                                                                                                                                                                                                                                                                                                                   |
| Date of search: 1.08.2018                              |         |                                                                                                                                                                                                                                                                                                                                                                                                                                   |
| 1                                                      | 151,577 | TITLE (implementation OR implementations OR implementing OR implement OR implements OR implemented OR “process evaluation” OR “formative evaluation” OR “knowledge translation” OR dissemination OR acceptability OR adoption OR appropriateness OR “implementation costs” OR feasibility OR fidelity OR penetration OR sustainability OR routinization OR institutionalization OR penetration OR applicability OR compatibility) |
| 2                                                      | 659,436 | TITLE (measure OR measures OR measurement OR measuring OR indicator OR indicators OR index OR indices OR rates OR validation OR monitoring OR “outcome assessment” OR “process assessment”)                                                                                                                                                                                                                                       |
| 3                                                      | 6,438   | #1 AND #2                                                                                                                                                                                                                                                                                                                                                                                                                         |
| 4                                                      | 4,669   | limit #3 to last 10 Years                                                                                                                                                                                                                                                                                                                                                                                                         |
| 5                                                      | 495     | exclude MEDLINE records                                                                                                                                                                                                                                                                                                                                                                                                           |
| <b>PsycINFO (EBSCO) Database: PsycINFO (2008-2018)</b> |         |                                                                                                                                                                                                                                                                                                                                                                                                                                   |
| Date of search: 1.08.2018                              |         |                                                                                                                                                                                                                                                                                                                                                                                                                                   |
| 1                                                      | 36,091  | TI (implementation OR implementations OR implementing OR implement OR implements OR implemented OR “process evaluation” OR “formative evaluation” OR “knowledge translation” OR dissemination OR acceptability OR adoption OR appropriateness OR “implementation costs” OR feasibility OR fidelity OR penetration OR sustainability OR routinization OR institutionalization OR penetration OR applicability OR compatibility)    |
| 2                                                      | 133,303 | TI (measure OR measures OR measurement OR measuring OR indicator OR indicators OR index OR indices OR rates OR validation OR monitoring OR “outcome assessment” OR “process assessment”)                                                                                                                                                                                                                                          |
| 3                                                      | 1,342   | #1 AND #2                                                                                                                                                                                                                                                                                                                                                                                                                         |
| 4                                                      | 844     | limit to 2008/08-2018/08                                                                                                                                                                                                                                                                                                                                                                                                          |
